# Supplementary material for: Rheology of oligomer melts in the nematic and isotropic states
Source: Royal Society of Chemistry journal article supplement (doi:10.1039/d3sm01084h), 2023-01-01
Supplement: d3sm01084h1.pdf [file d3sm01084h1.pdf]

*Supplementary Information*

# **Rheology of Oligomer Melts in the Nematic and Isotropic States**

Grant E. Bauman<sup>1</sup>, Timothy J. White<sup>1,2\*</sup>

<sup>1</sup> Department of Chemical and Biological Engineering, University of Colorado Boulder, 596 UCB Boulder, CO 80309, USA

<sup>2</sup> Materials Science and Engineering Program, University of Colorado Boulder, 027 UCB Boulder, CO 80303, USA

\*Email: Tim.White@colorado.edu

Table of Contents:

|                                                                       |   |
|-----------------------------------------------------------------------|---|
| S1. Mass of components used in oligomer synthesis.....                | 3 |
| S2. Gel permeation chromatography of oligomers.....                   | 4 |
| S3. Differential Scanning Calorimetry.....                            | 5 |
| S4. TMO <sub>x</sub> series flow sweeps.....                          | 6 |
| S5. Oligomer viscosity as function of liquid crystalline content..... | 7 |

Table S1. Mass of components used in oligomer synthesis

|                           | <b>Mass ratio<br/>DEGDA:C6M</b> | <b>Mass<br/>C6M<br/>(mg)</b> | <b>Mass<br/>DEGDA<br/>(mg)</b> | <b>Mass<br/>EDDT<br/>(mg)</b> | <b>Mass<br/>GDA<br/>(mg)</b> | <b>Mass<br/>BHT<br/>(mg)</b> | <b>Mass<br/>I369<br/>(mg)</b> | <b>Mass<br/>DPA<br/>(mg)</b> |
|---------------------------|---------------------------------|------------------------------|--------------------------------|-------------------------------|------------------------------|------------------------------|-------------------------------|------------------------------|
| <b>TMO<sub>0.72</sub></b> | 0:1                             | 348.13                       | 0                              | 117.92                        | 16.45                        | 5.00                         | 7.50                          | 5.00                         |
| <b>TMO<sub>0.67</sub></b> | 0.05:1                          | 322.40                       | 16.12                          | 126.35                        | 17.63                        | 5.00                         | 7.50                          | 5.00                         |
| <b>TMO<sub>0.64</sub></b> | 0.075:1                         | 310.91                       | 23.32                          | 130.12                        | 18.15                        | 5.00                         | 7.50                          | 5.00                         |
| <b>TMO<sub>0.62</sub></b> | 0.1:1                           | 300.22                       | 30.02                          | 133.62                        | 18.64                        | 5.00                         | 7.50                          | 5.00                         |
| <b>TMO<sub>0.6</sub></b>  | 0.125:1                         | 290.23                       | 36.28                          | 136.90                        | 19.10                        | 5.00                         | 7.50                          | 5.00                         |
| <b>TMO<sub>0.52</sub></b> | 0.25:1                          | 248.84                       | 62.21                          | 150.46                        | 20.99                        | 5.00                         | 7.50                          | 5.00                         |
| <b>TMO<sub>0.4</sub></b>  | 0.5:1                           | 193.62                       | 96.81                          | 168.56                        | 23.52                        | 5.00                         | 7.50                          | 5.00                         |
| <b>TMO<sub>0</sub></b>    | 1:0                             | 0                            | 218.12                         | 232.02                        | 32.37                        | 5.00                         | 7.50                          | 5.00                         |

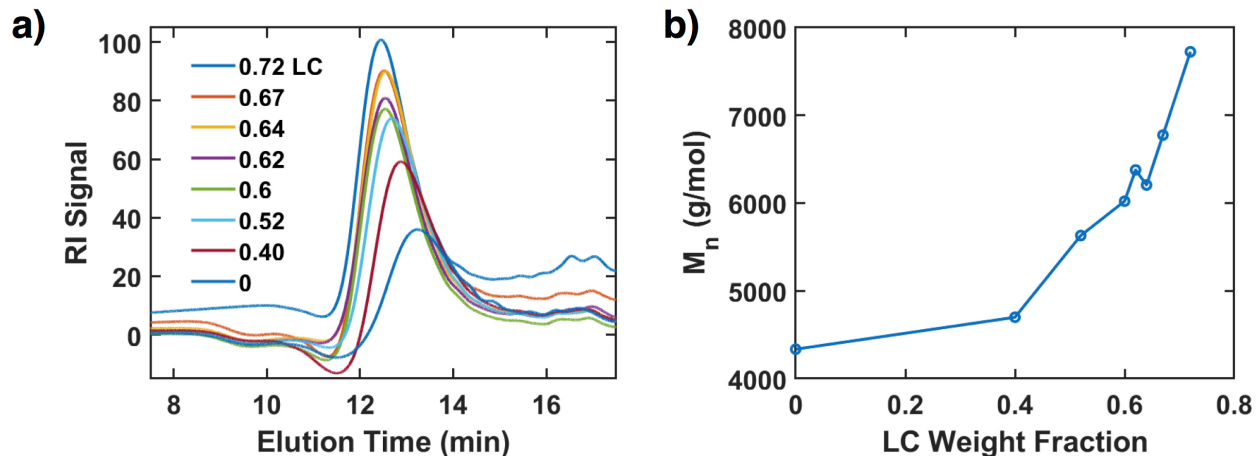

Figure S2. a) Results of gel permeation chromatography (GPC) on TMO<sub>x</sub> series of oligomers. GPC was performed on an Ecosec HLC-8320 GPC with chloroform as a solvent at a flow rate of 0.5 mL/min through a 15 cm TSKgel Super HM-N column. Samples were prepared in chloroform at a concentration of 1 mg/mL and were filtered through a 0.22  $\mu$ m syringe filter prior to measurement. Refractive index detector data was used for analysis. b) Number average molecular weight of oligomers calculated using a polystyrene standard against liquid crystalline weight fraction.

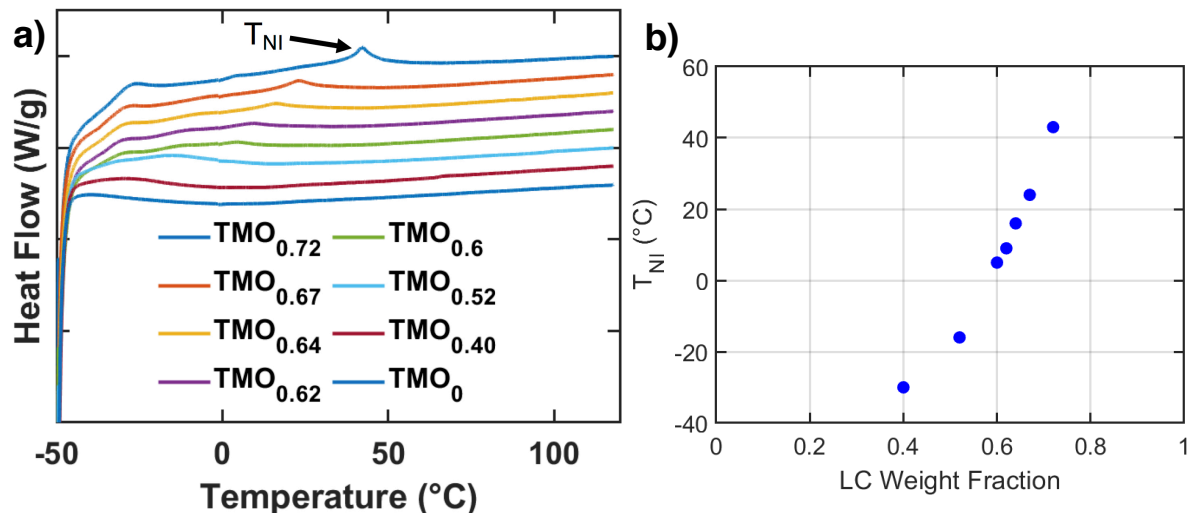

Figure S3. a) Differential Scanning Calorimetry (DSC) data of TMO<sub>x</sub> oligomers. DSC was performed on a TA Instruments Discovery DSC 2500. Samples of approximately 5 mg were heated to 120°C, cooled to -50°C, then heated to 120°C. Heating rates of 10°C/min were used with a cooling rate of 5°C/min. Data is reported from the second heating cycle. The highest temperature endothermic peak corresponds to T<sub>NI</sub>. b) T<sub>NI</sub> of the TMO<sub>x</sub> oligomers as a function of liquid crystalline weight fraction.

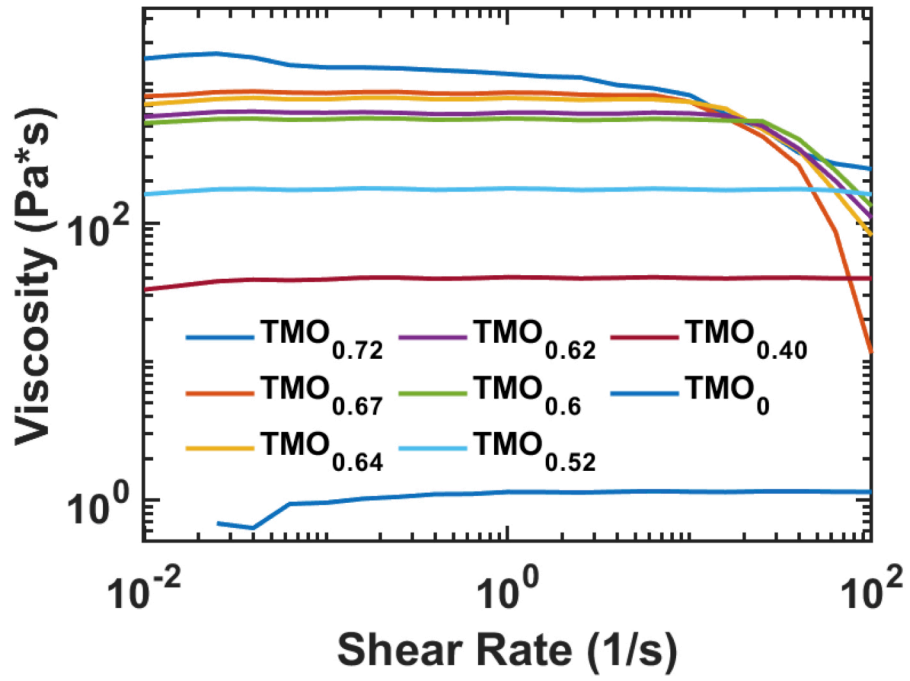

Figure S4. Flow sweeps of TMO<sub>x</sub> series of oligomers.

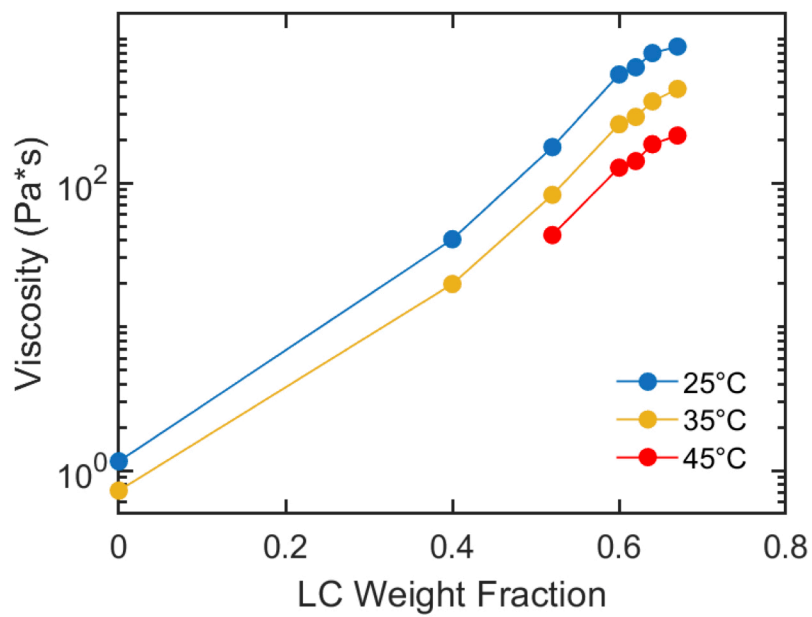

Figure S5. Rheology of TMO<sub>x</sub> series of oligomers at three different temperatures as a function of the liquid crystalline weight fraction.
